# Supplementary material
Source: PubMed Central journal article supplement (PMC10644245)
Supplement: jamainternmed-e235239-s001.pdf [file jamainternmed-e235239-s001.pdf]

## Data Sharing Statement

Sanford. Shift From Smoking Cigarettes to Vaping Nicotine in Young Adults. *JAMA Intern Med.* Published November 13, 2023. doi:10.1001/jamainternmed.2023.5239

### Data

**Data available:** Yes, the Restricted Use Files are available upon request through ICPSR at the University of Michigan (<https://www.icpsr.umich.edu/web/pages/>)

**Data types:** Deidentified restricted participant data

**How to access data:** The data utilized in this paper were US FDA PATH Restricted Use Files (RUF), which are managed elsewhere (Inter-university Consortium for Political and Social Research -- ICPSR -- at the University of Michigan). We applied for access to the RUF and completed all analyses on a separate ICPSR server. Researchers interested in using PATH RUF files are encouraged to similarly apply for access to the data via <https://www.icpsr.umich.edu/web/NAHDAP/studies/36231>. Similar but not identical public use files (PUF) for PATH are readily available at <https://nida.nih.gov/research/nida-research-programs-activities/population-assessment-tobacco-health-path-study/data-access>.

**When available:** With publication

### Supporting Documents

**Document types:** None

### Additional Information

**Who can access the data:** At reviewers' request, when wave 6 data was not yet available for public use, we utilized restricted use data, which are available to the research community via application through ICPSR. Public versions for waves 1-6 are now available to download at <https://nida.nih.gov/research/nida-research-programs-activities/population-assessment-tobacco-health-path-study/data-access>.

**Types of analyses:** N/A

**Mechanisms of data availability:** As described above, these data can be accessed via an application through ICPSR for the Restricted Use File. They can also be accessed through a simple download of the Public Use File.

**Any additional restrictions:** All RUF analyses must be completed on an ICPSR server after completion of a data sharing agreement.
